# Supplementary material
Source: PubMed Central journal article supplement (PMC4431592)
Supplement: NIHMS685469-supplement-Supplementary_material.pdf [file NIHMS685469-supplement-Supplementary_material.pdf]

## Supporting Information

### Selective inhibitors of Cyclin-G associated kinase (GAK) as anti-hepatitis C agents

Sona Kovackova<sup>†,‡,#</sup>, Lei Chang<sup>†,‡,#</sup>, Elena Bekerman<sup>†</sup>, Gregory Neveu<sup>†</sup>, Rina Barouch-Bentov<sup>†</sup>, Apirat Chaikuad<sup>§</sup>, Christina Heroven<sup>§</sup>, Michal Šála<sup>†,‡</sup>, Steven De Jonghe<sup>†,‡</sup>, Stefan Knapp<sup>§</sup>, Shirit Einav<sup>†</sup>, Piet Herdewijn<sup>†,‡,\*</sup>

<sup>†</sup>KU Leuven, Rega Institute for Medical Research, Laboratory of Medicinal Chemistry, Minderbroedersstraat 10, 3000 Leuven, Belgium.

<sup>‡</sup> KU Leuven, Interface Valorisation Platform, Kapucijnenvoer 33, 3000 Leuven, Belgium.

<sup>†</sup> Department of Medicine, Division of Infectious Diseases and Geographic Medicine, and Department of Microbiology and Immunology, Stanford University School of Medicine, Stanford, California, USA.

<sup>§</sup> University of Oxford, Target Discovery Institute (TDI) and Structural Genomics Consortium (SGC), Old Road Campus Research Building, Oxford OX3 7DQ, UK.

<sup>#</sup> Both authors contributed equally

\* Phone: +32 16 337387. Fax: +32 16 337340. E-mail: Piet.Herdewijn@rega.kuleuven.be

### Supporting information - Table of contents

1. NMR spectra of selected intermediates and final compounds
2. HPLC purity of final compounds
3. X-ray crystallography

## NMR spectra of selected intermediates and final compounds

### Compound 4 - $^1\text{H}$ NMR spectrum

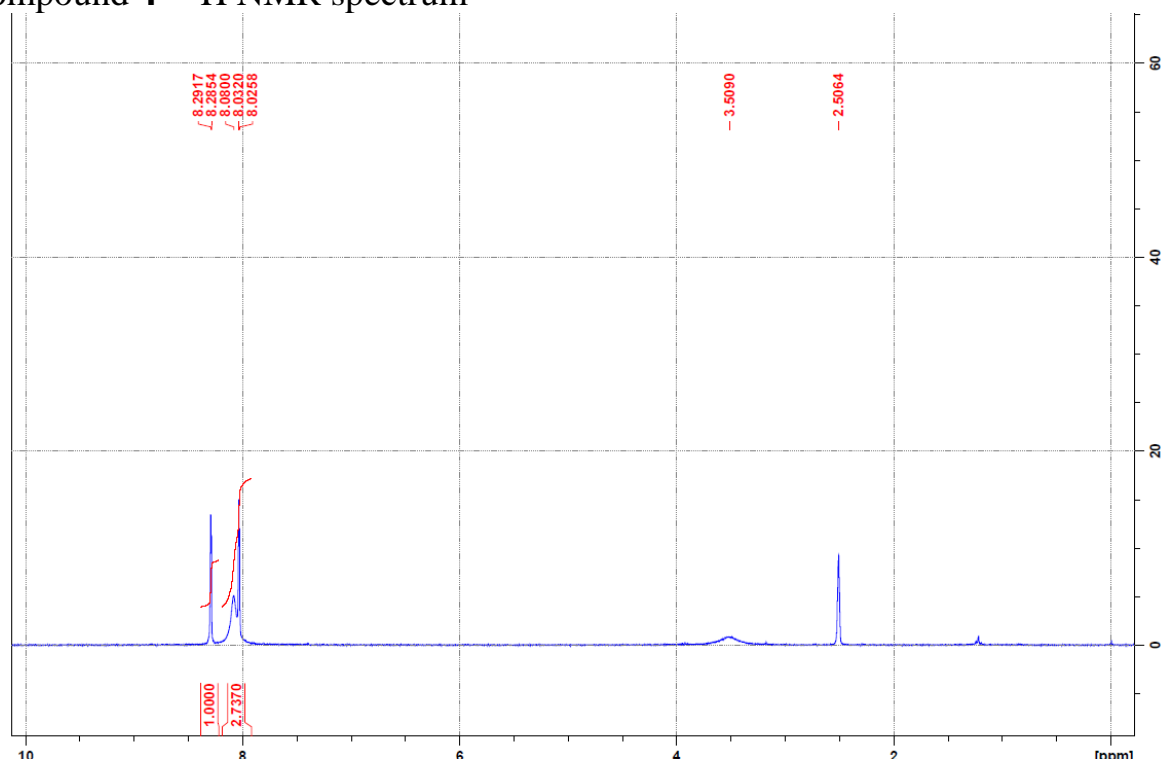

### Compound 4 - $^{13}\text{C}$ NMR spectrum

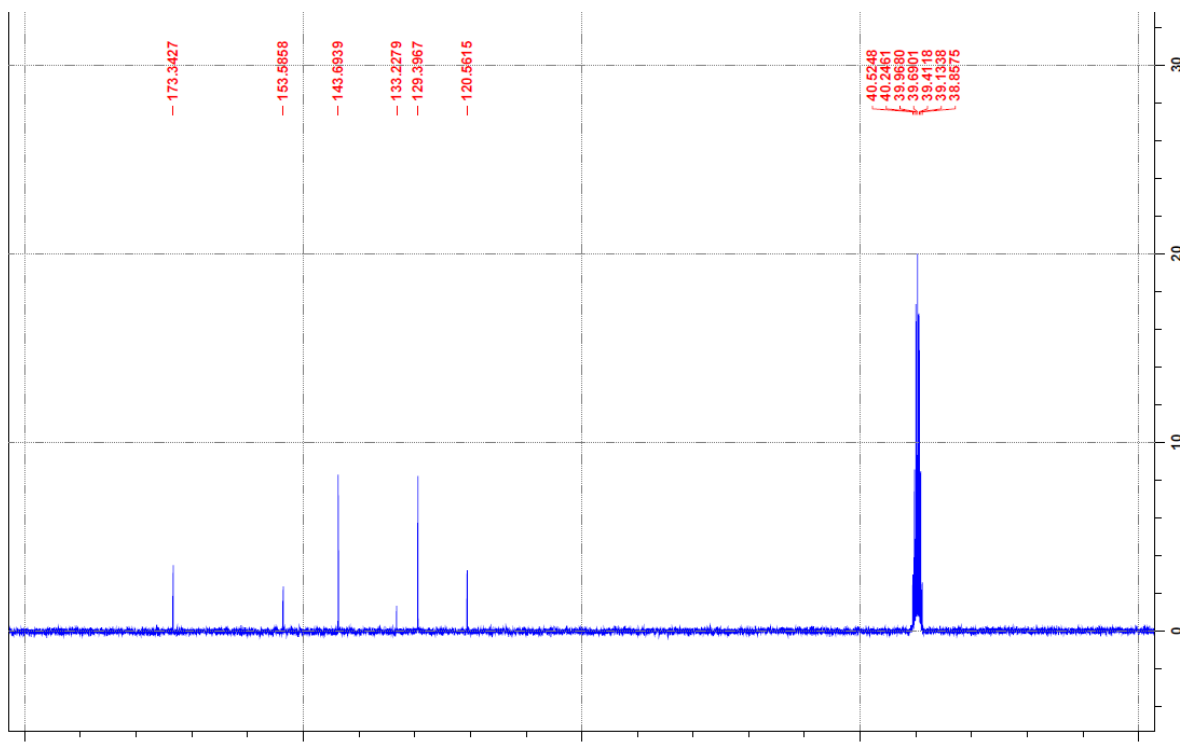

### Compound 6 – $^1\text{H}$ NMR spectrum

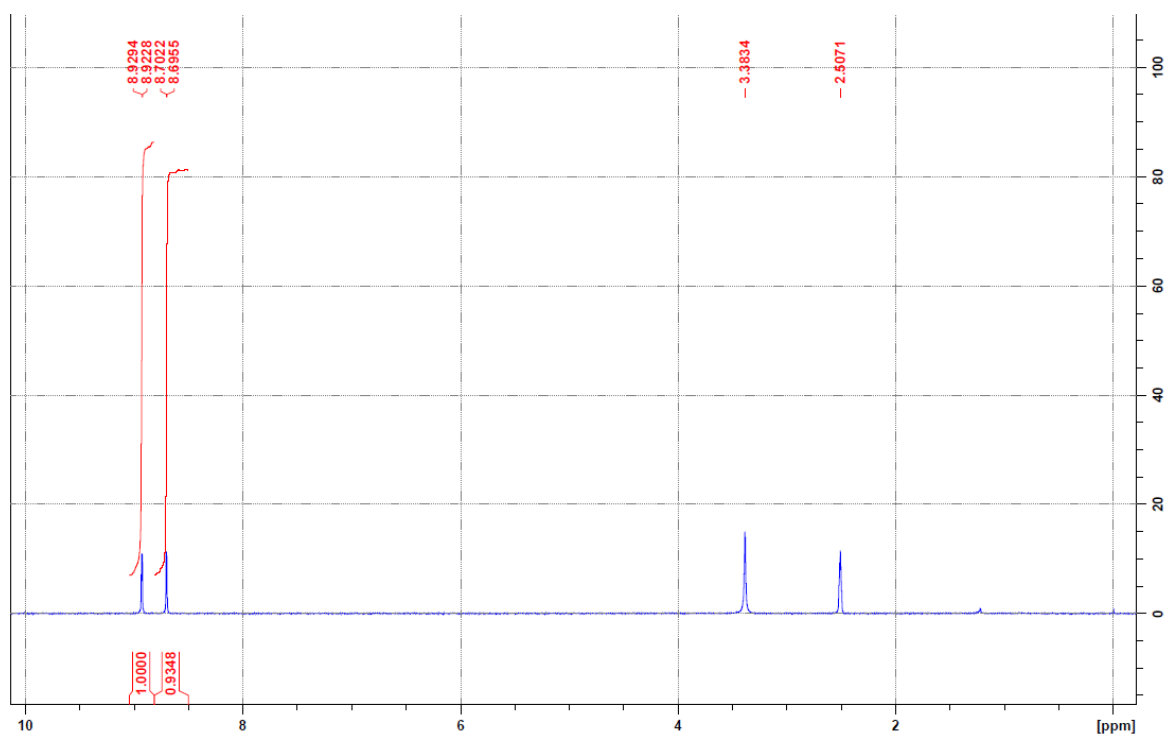

### Compound 6 – $^{13}\text{C}$ NMR spectrum

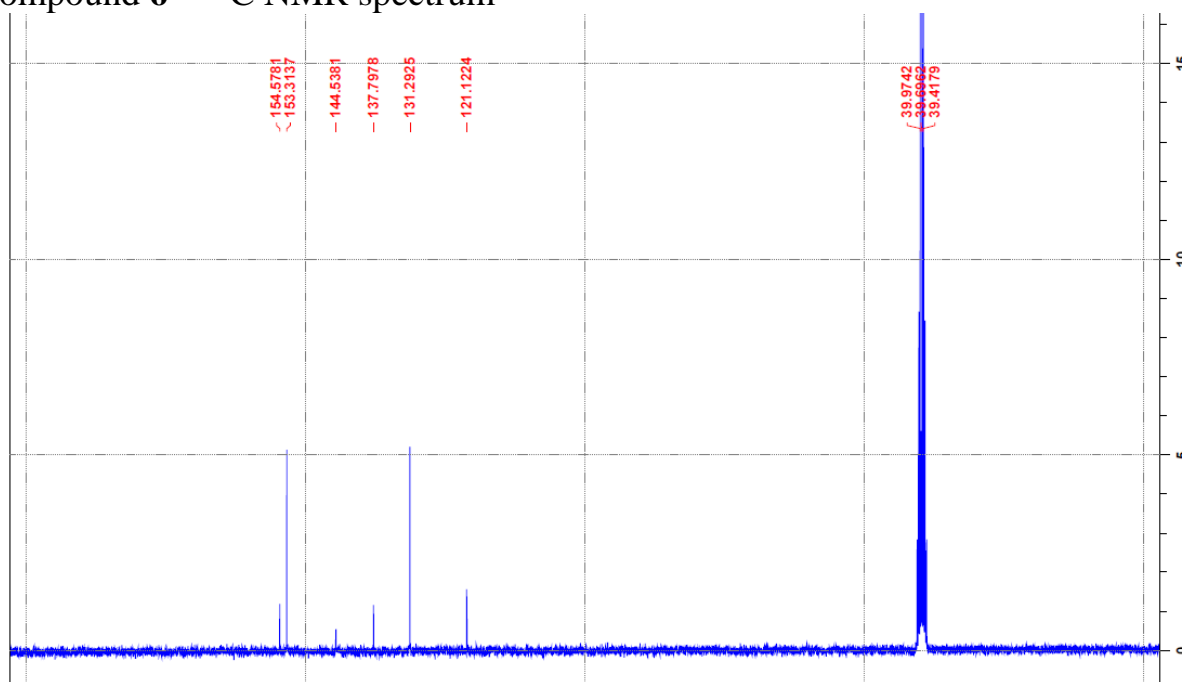

### Compound **12g** – $^1\text{H}$ NMR spectrum

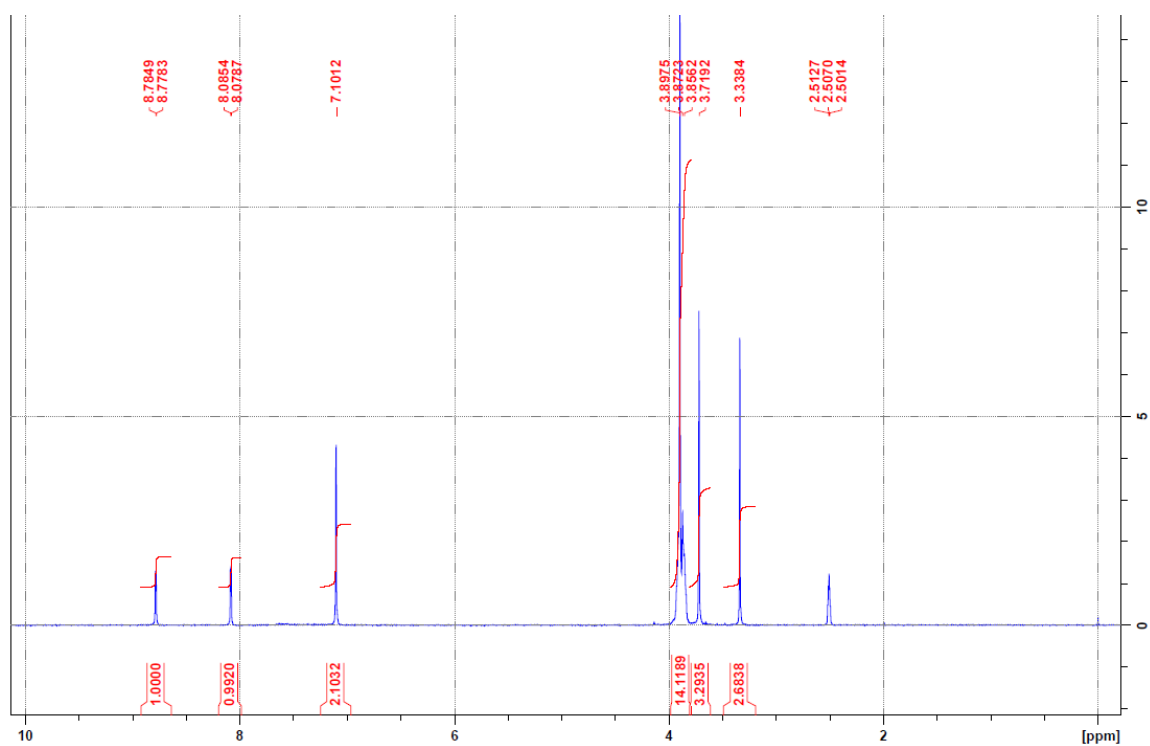

### Compound **12g** – $^{13}\text{C}$ NMR spectrum

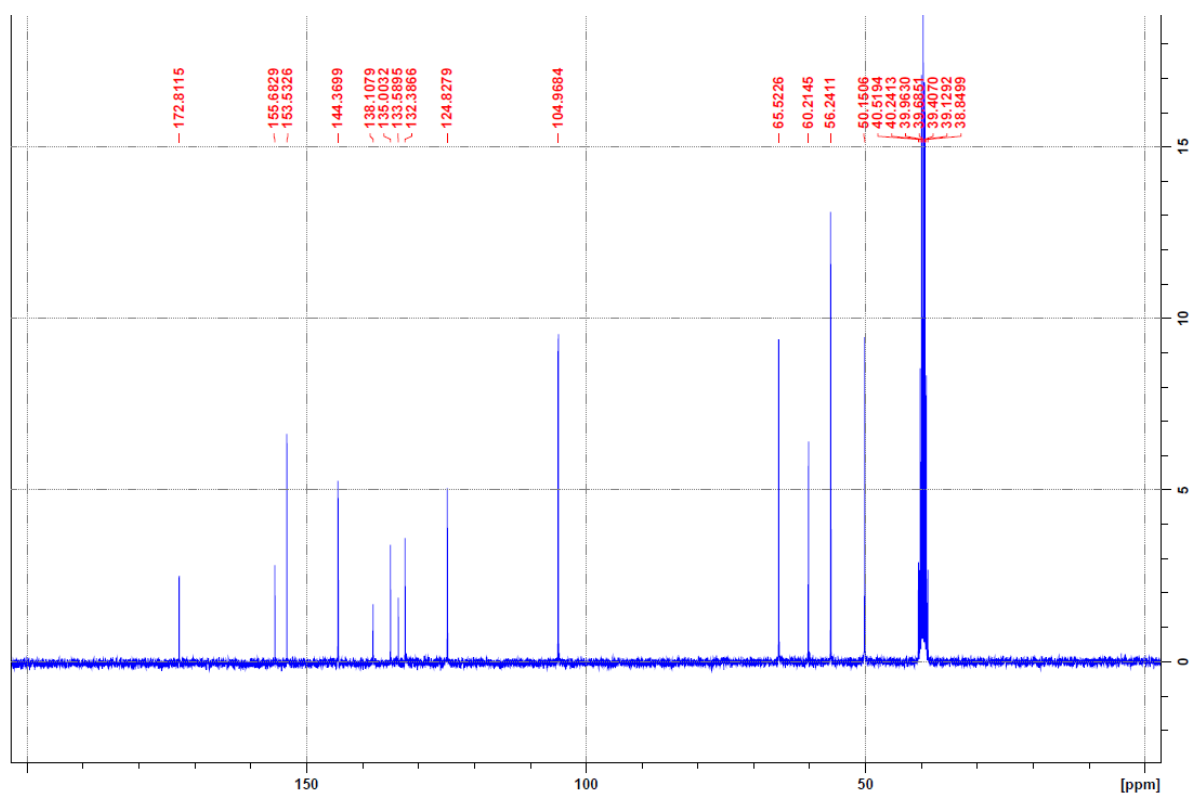

### Compound **12i** – $^1\text{H}$ NMR spectrum

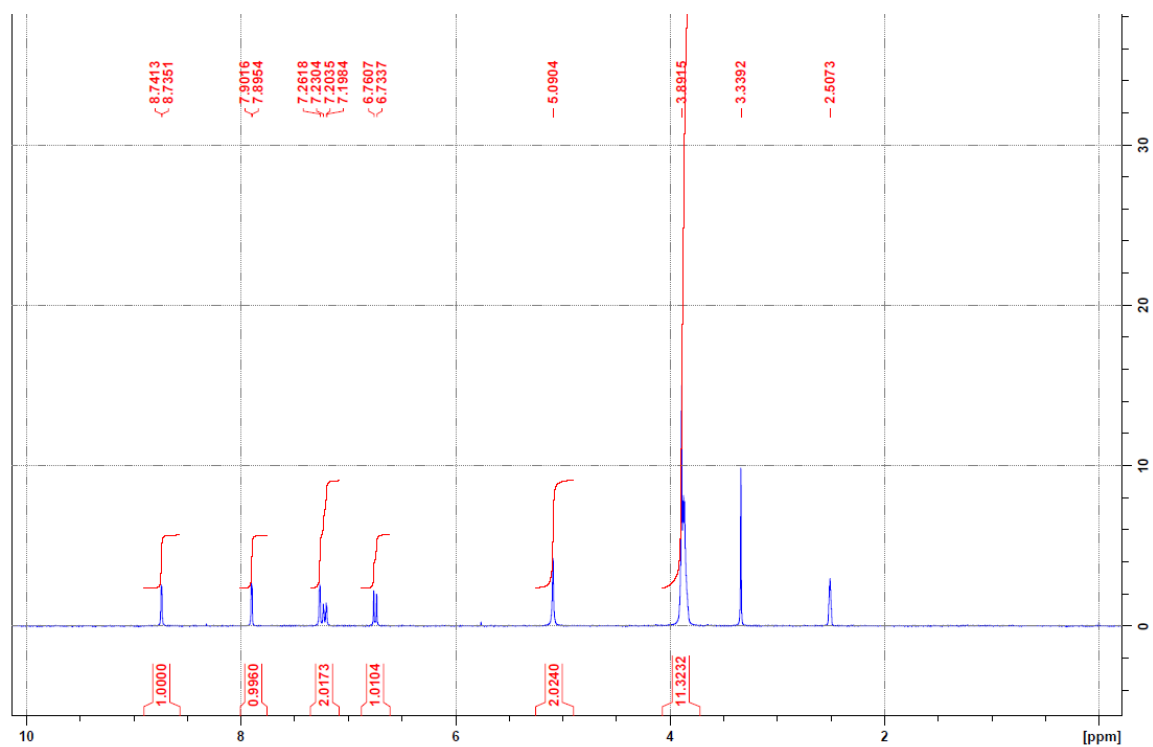

### Compound **12i** – $^{13}\text{C}$ NMR spectrum

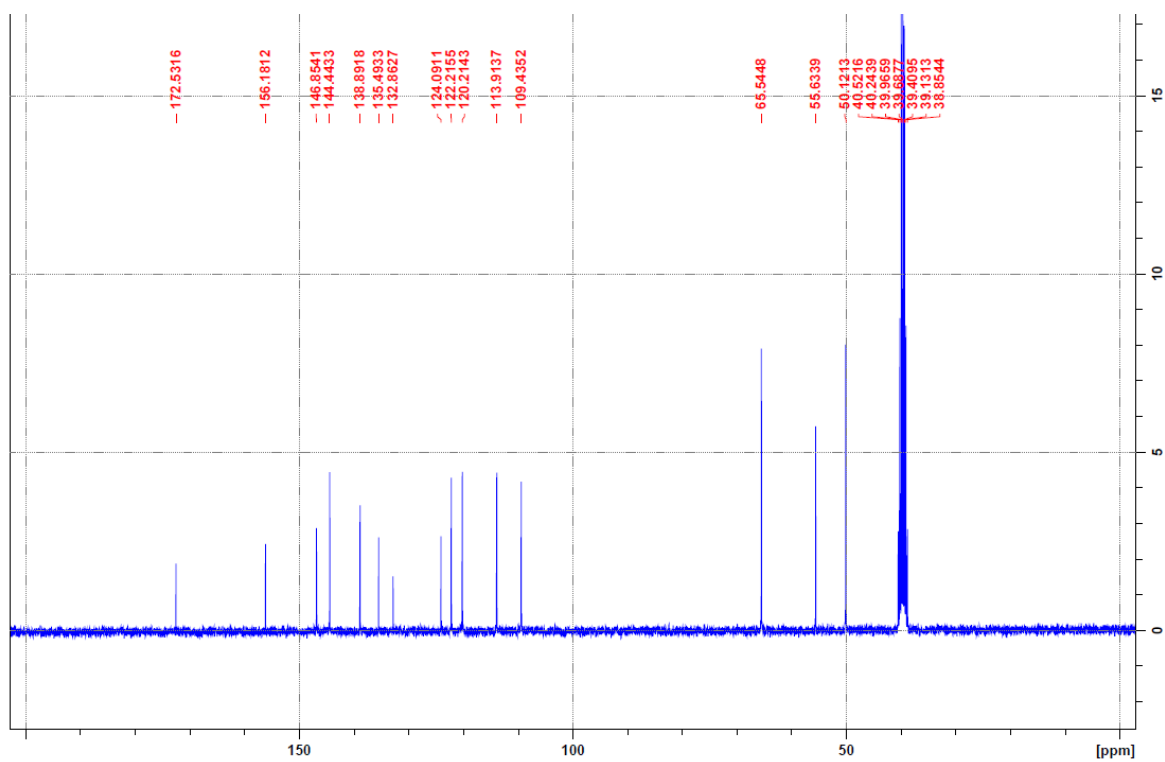

### HPLC purity data of final compounds

Purity of final compounds was determined by analytical RP-HPLC analysis on a XBridge column (C-18, 5  $\mu$ m, 4.6 mm  $\times$  150 mm) in combination with a Waters 600 HPLC system and a Waters 2996 photodiode array detector from Waters, Milford, Massachusetts, USA. Elution was done using a gradient mixture of H<sub>2</sub>O containing 0.2% (vol) of TFA (A) and Acetonitrile (B) as indicated in Table S2.

Table S1: Gradient table for RP-HPLC purity check.

|   | Time (min) | Flow (mL/min) | %A  | %B  |
|---|------------|---------------|-----|-----|
| 1 | 0          | 1             | 100 | 0   |
| 2 | 20         | 1             | 0   | 100 |
| 3 | 30         | 1             | 0   | 100 |
| 4 | 31         | 1             | 100 | 0   |
| 5 | 34         | 1             | 100 | 0   |

| Compound# | Rf (min) | Purity (%) |
|-----------|----------|------------|
| 5a        | 19.245   | 99.24      |
| 5b        | 18.343   | 97.37      |
| 5c        | 17.740   | 99.83      |
| 5d        | 18.242   | 98.25      |
| 5e        | 15.366   | 99.89      |
| 8a        | 18.229   | 96.96      |
| 8b        | 18.291   | 98.54      |
| 8c        | 18.181   | 99.89      |
| 8d        | 17.710   | 98.87      |
| 8e        | 15.508   | 99.94      |
| 9a        | 22.799   | 99.93      |
| 9b        | 22.981   | 99.97      |
| 9c        | 21.270   | 100        |
| 9d        | 22.016   | 99.46      |
| 9e        | 16.641   | 96.88      |
| 10a       | 18.413   | 99.89      |
| 10b       | 18.836   | 96.68      |
| 10c       | 17.888   | 99.79      |
| 10d       | 18.325   | 99.52      |
| 10e       | 15.423   | 99.58      |
| 11a       | 21.868   | 99.69      |
| 11b       | 16.116   | 90.32      |
| 11c       | 21.681   | 100        |
| 11d       | 21.045   | 98.83      |
| 11e       | 22.126   | 100        |
| 12a       | 24.15    | 99.78      |
| 12b       | 21.78    | 99.27      |
| 12c       | 24.23    | 99.46      |
| 12d       | 24.76    | 99.43      |
| 12e       | 24.83    | 97.93      |
| 12f       | 23.21    | 98.17      |
| 12g       | 24.13    | 99.88      |
| 12h       | 23.70    | 95.96      |
| 12i       | 18.25    | 95.19      |
| 12j       | 21.62    | 98.58      |

|            |        |       |
|------------|--------|-------|
| <b>13a</b> | 20.983 | 99.37 |
| <b>13b</b> | 19.44  | 99.77 |
| <b>13c</b> | 18.64  | 100   |
| <b>13d</b> | 20.46  | 98.75 |
| <b>13e</b> | 21.86  | 98.12 |
| <b>13f</b> | 22.529 | 99.45 |
| <b>13g</b> | 23.347 | 96.68 |
| <b>13h</b> | 23.622 | 99.89 |
| <b>13i</b> | 20.49  | 95.48 |
| <b>13j</b> | 20.68  | 97.14 |
| <b>13k</b> | 22.94  | 96.93 |

## X-ray crystallography

Table S2: Data collection and refinement statistics

| <b>Complex</b>                                   | <b>GAK:NbGAK_4-12i</b>                                                                        |
|--------------------------------------------------|-----------------------------------------------------------------------------------------------|
| <b>PDB accession code</b>                        | <b>4Y8D</b>                                                                                   |
| <b>Data Collection</b>                           |                                                                                               |
| Beamline                                         | Diamond, beamline I04-1                                                                       |
| Wavelength (Å)                                   | 0.9200                                                                                        |
| Resolution <sup>a</sup> (Å)                      | 43.58-2.10 (2.21-2.10)                                                                        |
| Spacegroup                                       | <i>P</i> 1                                                                                    |
| Cell dimensions                                  | $a = 37.7, b = 68.7, c = 89.9$ Å<br>$\alpha = 109.7, \gamma = 95.1^\circ, \beta = 99.0^\circ$ |
| No. unique reflections <sup>a</sup>              | 45,797 (6,533)                                                                                |
| Completeness <sup>a</sup> (%)                    | 94.7 (92.4)                                                                                   |
| $I/\sigma I^a$                                   | 11.9 (2.0)                                                                                    |
| $R_{\text{merge}}^a$                             | 0.071 (0.602)                                                                                 |
| Redundancy <sup>a</sup>                          | 3.7 (3.6)                                                                                     |
| Wilson B-factor (amplitudes, Å <sup>2</sup> )    | 42.9                                                                                          |
| <b>Refinement</b>                                |                                                                                               |
| ligands                                          | <b>Compound 12i</b>                                                                           |
| No. atoms in refinement (P/L/O) <sup>b</sup>     | 5,975/ 48/ 418                                                                                |
| $R_{\text{fact}}$ (%)                            | 19.2                                                                                          |
| $R_{\text{free}}$ (%)                            | 23.2                                                                                          |
| B-factors (P/L/O) <sup>b</sup> (Å <sup>2</sup> ) | 72/ 47/ 46                                                                                    |
| rms deviation bond <sup>c</sup> (Å)              | 0.014                                                                                         |
| rms deviation angle <sup>c</sup> (°)             | 1.4                                                                                           |
| Error in coordinates by Luzzati (Å)              | 0.34                                                                                          |
| <b>Molprobit</b>                                 |                                                                                               |
| Ramachandran favour                              | 97.0                                                                                          |
| Ramachandran allowed                             | 100.0                                                                                         |

<sup>a</sup> Values in brackets show the statistics for the highest resolution shells.

<sup>b</sup> P/L/O indicate protein, ligand molecule, and other (water and solvent molecules), respectively.

<sup>c</sup> rms indicates root-mean-square.



Supplemental Figure 1

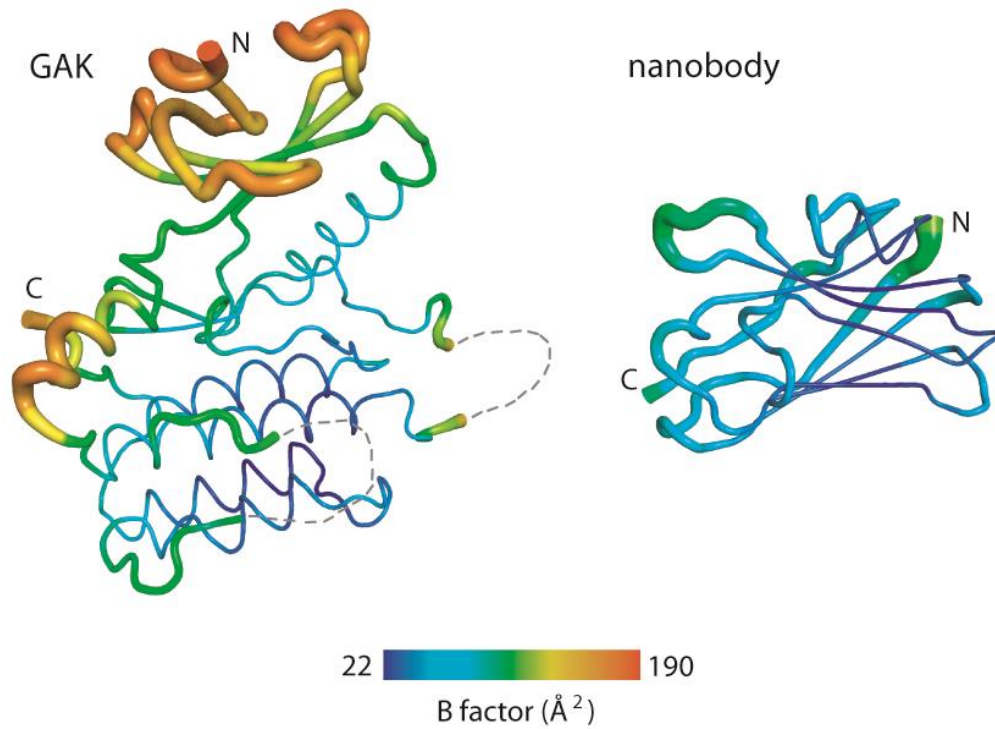

**Supplemental Figure 1:** B-factor distribution of the GAK catalytic domain as well as the nanobody. B-factors have been rendered according to colour (as indicated in the figure) and radii of the backbone trace (with increasing radii reflecting increasing B-values).
